# Supplementary material for: Integration of poly(3-hexylthiophene) conductive stripe patterns with 3D tubular structures for tissue engineering applications
Source: Royal Society of Chemistry journal article supplement (doi:10.1039/c6ra14109a), 2016-01-01
Supplement: c6ra14109a1.pdf [file c6ra14109a1.pdf]

## Supporting Information

### **Integration of poly(3-hexylthiophene) conductive stripe patterns with 3D tubular structures for tissue engineering applications**

Yingjuan Sun,<sup>a, c</sup> Hongyan Li,<sup>b, c</sup> Yuan Lin,<sup>\* a</sup> Li Niu<sup>b</sup> and Qian Wang<sup>a, d</sup>

*a. State Key Laboratory of Polymer Physics and Chemistry, Changchun Institute of Applied Chemistry, Changchun, 130022, P. R. China*

*b. State Key Laboratory of Electroanalytical Chemistry, c/o Engineering Laboratory of Modern Analytical Techniques, Changchun Institute of Applied Chemistry, Changchun, 130022, P. R. China*

*c. University of Chinese Academy of Sciences, Beijing, 100049, P. R. China*

*d. Department of Chemistry and Biochemistry, University of South Carolina, 631 Sumter Street, Columbia, South Carolina, 29208, USA*

*\* E-mail: linyuan@ciac.ac.cn*

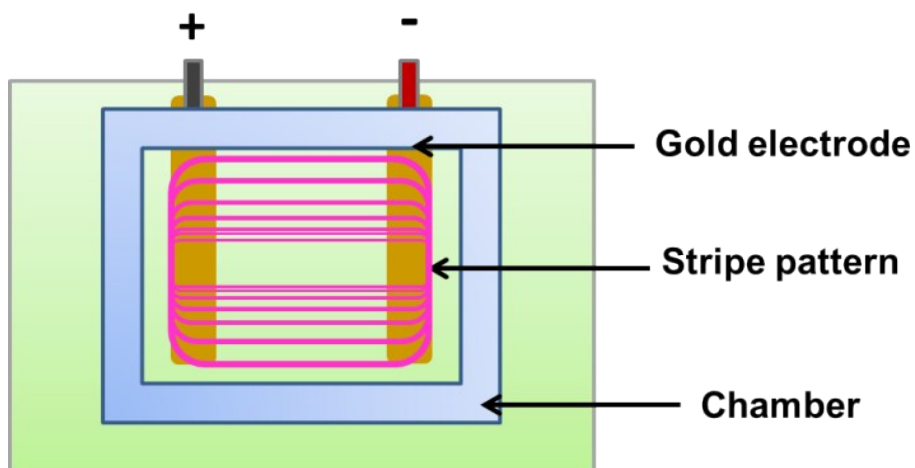

**Fig. S1** Schematic illustration of electrical stimulation process of cells cultured on the stripes on PI film.

| Samples         | Conductance (S)        | Resistance ( $\Omega$ ) |
|-----------------|------------------------|-------------------------|
| P3HT:PLA (1:1)  | $5.19 \times 10^{-9}$  | $1.93 \times 10^{10}$   |
| P3HT:PLA (1:5)  | $4.45 \times 10^{-10}$ | $2.25 \times 10^{11}$   |
| P3HT:PLA (1:10) | $1.48 \times 10^{-11}$ | $6.76 \times 10^{12}$   |

**Table S1.** Conductivity and resistance of stripe patterns self-assembled on the PI films.

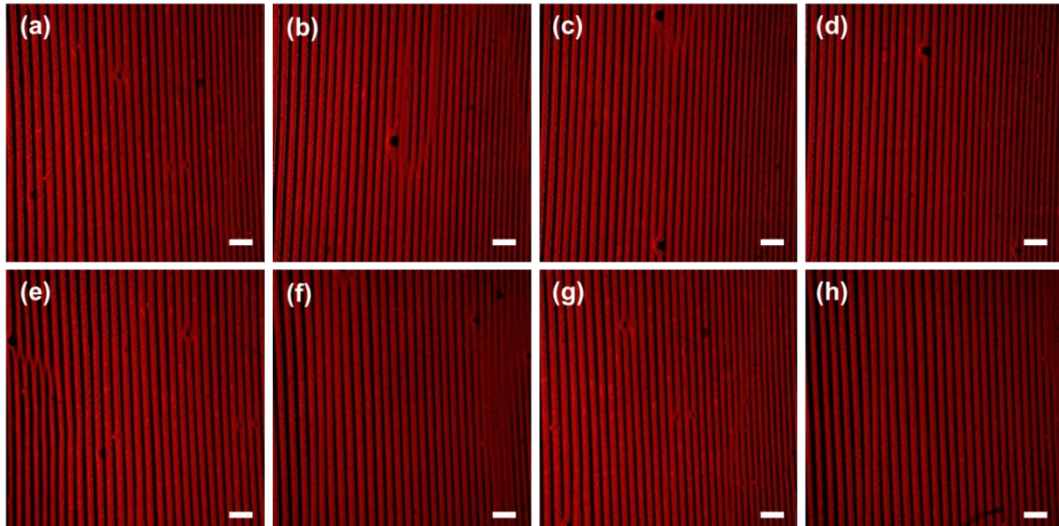

**Fig. S2** Fluorescence images of P3HT:PLA (1:5) patterns on PI films soaked in cell culture medium for different days. (a) for 0 d, (b) for 2 d, (c) for 4 d, (d) for 6 d, (e) for 8 d, (f) for 10 d, (g) for 12 d, (h) for 14 d. Scale bars are all 50  $\mu\text{m}$ .

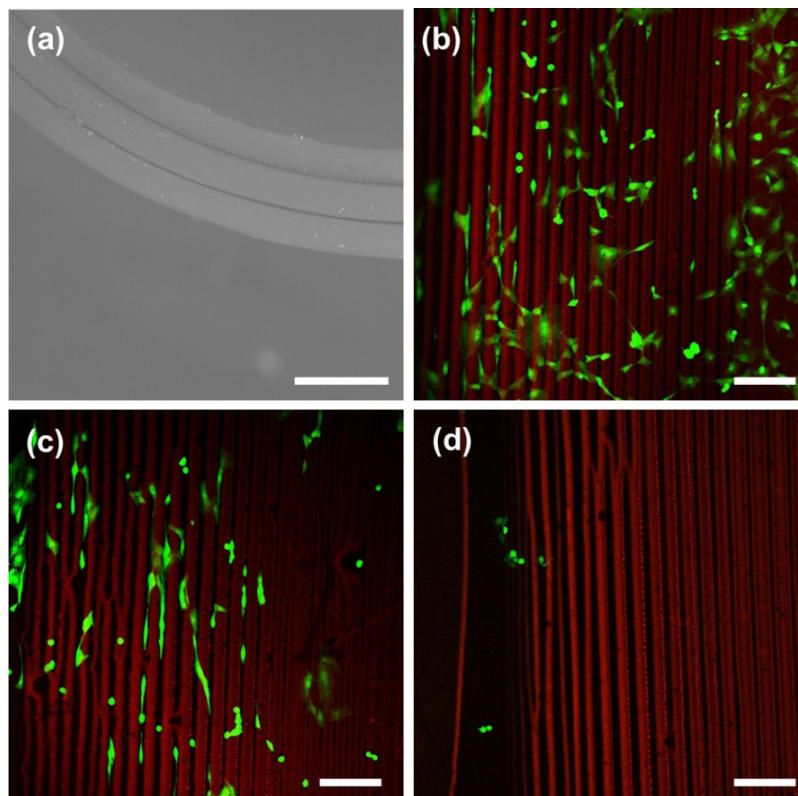

**Fig. S3** (a) SEM image of the PI film rolling-up for multilayer with the diameter of 3 mm. (b-d) Fluorescence images of MC 3T3-E1 cells cultured on the multi-layer tube for 24 h. (b) the first layer, (c) the second layer, (d) the third layer. Scale bars: 300  $\mu\text{m}$  for (a), 100  $\mu\text{m}$  for (b-d).

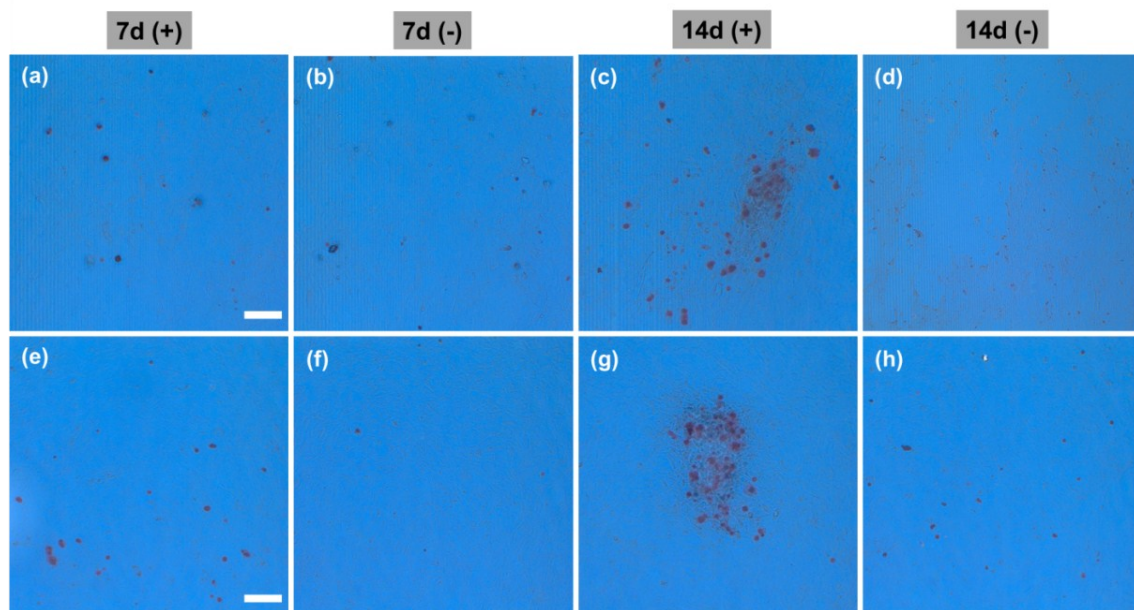

**Fig. S4** Alizarin red stained of MC 3T3-E1 cells cultured on P3HT: PLA (1:5) stripe patterned tube (a, b, c, d) with the diameter 3 mm and P3HT thin film prepared *via* spin coating (e, f, g, h) with or without electric stimulation after differentiation for 7 d and 14 d. Scale bars are all 200  $\mu\text{m}$ . (+) means with electric stimulation, while (-) means without electric stimulation.
